# Supplementary material
Source: Elsevier journal article supplement (https://www.sciencedirect.com/science/article/pii/S0021755721000863)
Supplement: mmc1 [file S0021755721000863:mmc1.docx]

**JPED-D-21-00154 – Supplemental Material**

**Supplemental Table 1 - Age-specific distribution of positive rate of EBV-DNA in plasma [n (%)].**

| **Age (years)** | **Males** | | **Females** | | **Total** | |
| --- | --- | --- | --- | --- | --- | --- |
|  | Positive | Negative | Positive | Negative | Positive | Negative |
| < 1 | 21 (1.1%) | 1855 (98.9%) | 14 (1.1%) | 1208 (98.9%) | 35 (1.1%) | 3063 (98.9%) |
| 2 | 234 (8.6%) | 2493 (91.4%) | 211 (10.1%) | 1881 (89.9%) | 445 (9.2%) | 4374 (90.8%) |
| 3 | 239 (9.9%) | 2177 (90.1%) | 196 (10.9%) | 1606 (89.1%) | 435 (10.3%) | 3783 (89.7%) |
| 4 | 293 (10.5%) | 2489 (89.5%) | 170 (9.7%) | 1585 (90.3%) | 463 (10.2%) | 4074 (89.8%) |
| 5 | 212 (9.1%) | 2127 (90.9%) | 163 (10.5%) | 1389 (89.5%) | 375 (9.6%) | 3516 (90.4%) |
| 6 | 155 (8.2%) | 1727 (91.8%) | 149 (9.9%) | 1350 (90.1%) | 304 (9.0%) | 3077 (91.0%) |
| 7 | 111 (6.9%) | 1509 (93.1%) | 113 (9.8%) | 1042 (90.2%) | 224 (8.1%) | 2551 (91.9%) |
| 8 | 98 (6.9%) | 1330 (93.1%) | 73 (7.4%) | 910 (92.6%) | 171 (7.1%) | 2240 (92.9%) |
| 9 | 55 (4.2%) | 1240 (95.8%) | 49 (6.8%) | 672 (93.2%) | 104 (5.2%) | 1912 (94.8%) |
| 10 | 27 (2.6%) | 1031 (97.4%) | 28 (5.5%) | 482 (94.5%) | 55 (3.5%) | 1513 (96.5%) |
| 11 | 27 (2.9%) | 916 (97.1%) | 23 (5.7%) | 384 (94.3%) | 50 (3.7%) | 1300 (96.3%) |
| 12 | 29 (3.7%) | 764 (96.3%) | 15 (3.1%) | 467 (96.9%) | 44 (3.5%) | 1231 (96.5%) |
| 13 | 10 (1.6%) | 611 (98.4%) | 15 (4.5%) | 319 (95.5%) | 25 (2.6%) | 930 (97.4%) |
| 14 | 18 (3.9%) | 443 (96.1%) | 10 (3.4%) | 288 (96.6%) | 28 (3.7%) | 731 (96.3%) |
| 15 | 13 (3.2%) | 392 (96.8%) | 4 (2.0%) | 193 (98.0%) | 17 (2.8%) | 585 (97.2%) |
| 16 | 7 (1.8%) | 374 (98.2%) | 4 (2.9%) | 135 (97.1%) | 11 (2.1%) | 509 (97.9%) |
